# Supplementary material
Source: publisher site journal article supplement (https://cdn.bio-protocol.org/journal/static/5174_Supplementary%20information.docx)
Supplement: Supplementary file 1 [file 5174_Supplementary%20information.docx]

Supplementary information for Simple and Fail-safe Method to Transform Miniprep *Escherichia coli* Strain K12 Plasmid Deoxyribonucleic acid (DNA) into Viable *Agrobacterium tumefaciens* EHA105 Cells for Plant Genetic Transformation

Beenzu Siamalube1, *, Emmanuel Ehinmitan1, Maina Ngotho2, Justus Onguso3 and Steven Runo4

1Department of Molecular Biology and Biotechnology, Pan African University Institute for Basic Sciences, Technology and Innovation, Nairobi, Kenya

2Department of Animal Science, Jomo Kenyatta University of Agriculture and Technology, Nairobi, Kenya

3Institute for Biotechnology Research, Jomo Kenyatta University of Agriculture and Technology, Nairobi, Kenya

4Department of Biochemistry, Microbiology and Biotechnology, Kenyatta University, Nairobi, Kenya

*For correspondence: [siamalube.beenzu@students.jkuat.ac.ke](mailto:siamalube.beenzu@students.jkuat.ac.ke)


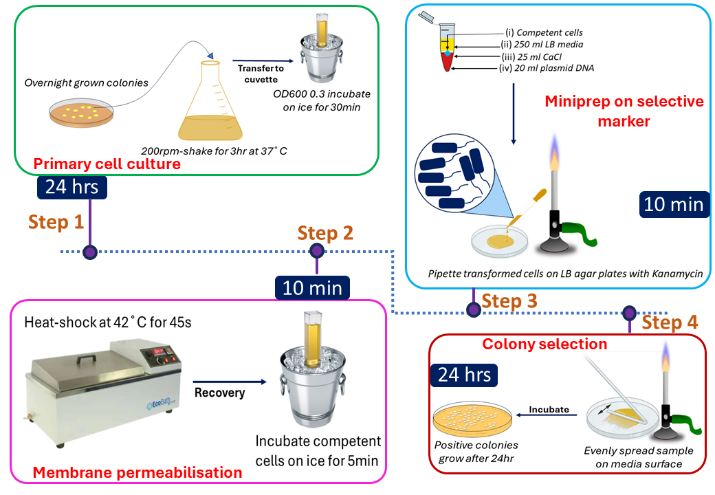


**Figure S1. Making competent *E. coli* cells using CaCl2 and the heat-shock method**
